# Supplementary material for: Revised phylogeny and historical biogeography of the cosmopolitan aquatic plant genus Typha (Typhaceae)
Source: PubMed Central journal article supplement (PMC5995854; doi:10.1038/s41598-018-27279-3), 2018-06-11
Supplement: 41598_2018_27279_MOESM1_ESM.pdf [file 41598_2018_27279_MOESM1_ESM.pdf]

# Revised phylogeny and historical biogeography of the cosmopolitan aquatic plant genus

## *Typha* (Typhaceae)

Beibei Zhou<sup>1,+</sup>, Tiejiao Tu<sup>2,+</sup>, Fanjiao Kong<sup>1</sup>, Jun Wen<sup>3,\*</sup>, Xinwei Xu<sup>1,\*</sup>

<sup>1</sup>National Field Station of Freshwater Ecosystem of Liangzi Lake, College of Life Sciences, Wuhan University, Wuhan 430072, PR China

<sup>2</sup>Key Laboratory of Plant Resources Conservation and Sustainable Utilization, South China Botanical Garden, Chinese Academy of Sciences, Guangzhou 510650, PR China

<sup>3</sup>Department of Botany, National Museum of Natural History, MRC 166, Smithsonian Institution, Washington, DC 20013-7012, USA

<sup>+</sup>these authors contributed equally to this work

\*Correspondence and requests for materials should be addressed to X. X. [xuxw@whu.edu.cn](mailto:xuxw@whu.edu.cn) or J. W. [wenj@si.edu](mailto:wenj@si.edu)

**Table S1** Ancestral area reconstruction using the S-DIVA and DEC analysis based on the chronogram inferred using BEAST. Node number is indicated in Figure 3. PP is the posterior probability of the node. Letter codes represent biogeographic regions: A - North America, B - Indo-Pacific, C - West Eurasia, D - East Eurasia, E - Africa, F - South America, and G - Australia. Support for specific reconstructions are indicated by the integer to the right of the letter code. Reconstructions with less than 5% support were omitted.

| Node | Age (Mya) |             | Ancestral areas |                                                    |                                                 |                                 |                     |
|------|-----------|-------------|-----------------|----------------------------------------------------|-------------------------------------------------|---------------------------------|---------------------|
|      | Mean      | 95% HPD     | PP              | S-DIVA                                             |                                                 | DEC                             |                     |
|      |           |             |                 | Area                                               | Probability                                     | Area                            | Probability         |
| 12   | 10.01     | 4.20-19.20  | 1.00            | AC/CE/ACE/CDE/CD/ACD/C/ACDE                        | 12.5/12.5/12.5/12.5/12.5/12.5/12.5              | ACDE/C/CD/ACD/CDE               | 27/22/18/9/9        |
| 13   | --        | --          | 0.90            | ABDE/ABE/ABCD/ABCE/A CDE/BCD/BCDE/BCE/CD/B C/D/ABC | 8.3/8.3/8.3/8.3/8.3/8.3/8.3/8.3/8.3/8.3/8.3/8.3 | D/ACDE/CD/ABCD/BCDE/C/BCD/BC    | 29/17/13/7/7/7/6/5  |
| 14   | 3.99      | 1.38-8.53   | 1.00            | BDEG/DE/DEG/BDE                                    | 25/25/25/25                                     | DE/BDEG/BDE /DEG/D              | 28/18/16/16/8       |
| 15   | 5.73      | 2.27-11.80  | 1.00            | D                                                  | 100                                             | D/DE/ACDF/BDEG/CD/AD            | 52/14/10/9/8/7      |
| 16   | 8.43      | 3.40-16.85  | 1.00            | D                                                  | 100                                             | D/CD/AD                         | 73/14/13            |
| 17   | 10.30     | 4.09-19.84  | 1.00            | D                                                  | 100                                             | D                               | 100                 |
| 18   | --        | --          | 0.89            | D                                                  | 100                                             | D                               | 100                 |
| 19   | 17.20     | 7.99-30.86  | 1.00            | BCD/ABCD/ABDE/BCDE/A CDE/D                         | 16.7/16.7/16.7/16.7/16.7/16.7                   | D/ACDE/ABCD/BCDE/CD/BC D        | 20/16/10/10/7/5     |
| 20   | 11.11     | 3.78-24.01  | 1.00            | D/BCD/BC                                           | 33/33/33                                        | D/BCD/CD/BD/ABCD/BCDE/BCDG/BCDF | 28/17/12/12/8/8/8/8 |
| 21   | 39.03     | 22.64-57.59 | 1.00            | D/BCD/ABCD/ABDE/BCDE/ACDE                          | 16.7/16.7/16.7/16.7/16.7/16.7                   | D                               | 8                   |

**Table S2** The collection information of samples used in this study and their GenBank accession numbers of seven chloroplast DNA regions.

| Species                   | Collection site              | Voucher No.     | Code                            | atpB-rbcL | psbA-trnH | psbD-trnT | rpl32-trnL | rps16 intro | rps16-trnK | trnL-trnF |
|---------------------------|------------------------------|-----------------|---------------------------------|-----------|-----------|-----------|------------|-------------|------------|-----------|
| <i>Typha angustifolia</i> | China, Jinlin                | Xu0068          | <i>T. angustifolia_China1</i>   | MG324303  | MG430801  | MG431016  | MG430844   | MG430887    | MG430930   | MG430973  |
| <i>Typha angustifolia</i> | China, Qinghai               | Tu519-1         | <i>T. angustifolia_China2</i>   | MG324304  | MG430802  | MG431017  | MG430845   | MG430888    | MG430931   | MG430974  |
| <i>Typha angustifolia</i> | China, Shaanxi               | Tu522           | <i>T. angustifolia_China3</i>   | MG324305  | MG430803  | MG431018  | MG430846   | MG430889    | MG430932   | MG430975  |
| <i>Typha angustifolia</i> | China, Shaanxi               | Tu523           | <i>T. angustifolia_China4</i>   | MG324306  | MG430804  | MG431019  | MG430847   | MG430890    | MG430933   | MG430976  |
| <i>Typha angustifolia</i> | China, Hainan                | Xu2012          | <i>T. angustifolia_China5</i>   | MG324307  | MG430805  | MG431020  | MG430848   | MG430891    | MG430934   | MG430977  |
| <i>Typha angustifolia</i> | China, Xingjiang             | Xu4155          | <i>T. angustifolia_China6</i>   | MG324318  | MG430816  | MG431031  | MG430859   | MG430902    | MG430945   | MG430988  |
| <i>Typha angustifolia</i> | China, Xingjiang             | Xu4450          | <i>T.angustifolia_China7</i>    | MG324319  | MG430817  | MG431032  | MG430860   | MG430903    | MG430946   | MG430989  |
| <i>Typha angustifolia</i> | Germany, Bavaria             | S. Renner s.n.  | <i>T. angustifolia_Germany</i>  | MG324320  | MG430818  | MG431033  | MG430861   | MG430904    | MG430947   | MG430990  |
| <i>Typha angustifolia</i> | USA, Virginia                | Wen9820         | <i>T. angustifolia_USA</i>      | MG324321  | MG430819  | MG431034  | MG430862   | MG430905    | MG430948   | MG430991  |
| <i>Typha domingensis</i>  | China, Yunnan                | Xu2212          | <i>T. domingensis_China1</i>    | MG324308  | MG430806  | MG431021  | MG430849   | MG430892    | MG430935   | MG430978  |
| <i>Typha domingensis</i>  | China, Yunnan                | Tu507           | <i>T. domingensis_China2</i>    | MG324309  | MG430807  | MG431022  | MG430850   | MG430893    | MG430936   | MG430979  |
| <i>Typha domingensis</i>  | China, Xinjiang              | Xu2564          | <i>T. domingensis_China3</i>    | MG324315  | MG430813  | MG431028  | MG430856   | MG430899    | MG430942   | MG430985  |
| <i>Typha domingensis</i>  | Israel, Beersheba            | S. Volis s.n.   | <i>T. domingensis_Israel</i>    | MG324316  | MG430814  | MG431029  | MG430857   | MG430900    | MG430943   | MG430986  |
| <i>Typha domingensis</i>  | Indonesia, West Java         | Wen10698        | <i>T. domingensis_Indonesia</i> | MG324311  | MG430809  | MG431024  | MG430852   | MG430895    | MG430938   | MG430981  |
| <i>Typha domingensis</i>  | Pakistan, Khyber Pakhtunkhwa | S.K.Marwat s.n. | <i>T. domingensis_Pakistan</i>  | MG324310  | MG430808  | MG431023  | MG430851   | MG430894    | MG430937   | MG430980  |
| <i>Typha domingensis</i>  | USA, Texas                   | Moody1070       | <i>T. domingensis_USA</i>       | MG324317  | MG430815  | MG431030  | MG430858   | MG430901    | MG430944   | MG430987  |
| <i>Typha latifolia</i>    | China, Heilongjiang          | Xu107           | <i>T. latifolia_China1</i>      | MG324324  | MG430822  | MG431037  | MG430865   | MG430908    | MG430951   | MG430994  |
| <i>Typha latifolia</i>    | China, Xingjiang             | Xu4436          | <i>T. latifolia_China2</i>      | MG324325  | MG430823  | MG431038  | MG430866   | MG430909    | MG430952   | MG430995  |
| <i>Typha latifolia</i>    | USA, Virginia                | Wen9821         | <i>T. latifolia_USA1</i>        | MG324328  | MG430826  | MG431041  | MG430869   | MG430912    | MG430955   | MG430998  |
| <i>Typha latifolia</i>    | USA, Alaska                  | Moody1077       | <i>T. latifolia_USA2</i>        | MG324329  | MG430827  | MG431042  | MG430870   | MG430913    | MG430956   | MG430999  |
| <i>Typha latifolia</i>    | Kenya, Kitale                | X. Yan s.n.     | <i>T. latifolia_Kenya</i>       | MG324323  | MG430821  | MG431036  | MG430864   | MG430907    | MG430950   | MG430993  |
| <i>Typha latifolia</i>    | Germany, Bavaria             | D/0053          | <i>T. latifolia_Germany</i>     | MG324327  | MG430825  | MG431040  | MG430868   | MG430911    | MG430954   | MG430997  |
| <i>Typha latifolia</i>    | UK, Bramhope                 | Reader s.n.     | <i>T. latifolia_England</i>     | MG324326  | MG430824  | MG431039  | MG430867   | MG430910    | MG430953   | MG430996  |

|                                    |                                 |                    |                                  |          |          |          |          |          |          |          |
|------------------------------------|---------------------------------|--------------------|----------------------------------|----------|----------|----------|----------|----------|----------|----------|
| <i>Typha orientalis</i>            | China, Zhejiang                 | Xu1065             | <i>T. orientalis_China1</i>      | MG324330 | MG430828 | MG431043 | MG430871 | MG430914 | MG430957 | MG431000 |
| <i>Typha orientalis</i>            | China, Hunan                    | Tu505              | <i>T. orientalis_China2</i>      | MG324331 | MG430829 | MG431044 | MG430872 | MG430915 | MG430958 | MG431001 |
| <i>Typha orientalis</i>            | China, Guangdong                | Tu502              | <i>T. orientalis_China3</i>      | MG324332 | MG430830 | MG431045 | MG430873 | MG430916 | MG430959 | MG431002 |
| <i>Typha laxmannii</i>             | China, Guangdong                | Tu526              | <i>T. laxmannii_China1</i>       | MG324333 | MG430831 | MG431046 | MG430874 | MG430917 | MG430960 | MG431003 |
| <i>Typha laxmannii</i>             | China, Shaanxi                  | Xu5239             | <i>T. laxmannii_China2</i>       | MG324334 | MG430832 | MG431047 | MG430875 | MG430918 | MG430961 | MG431004 |
| <i>Typha laxmannii</i>             | China, Jilin                    | Xu0069             | <i>T. laxmannii_China3</i>       | MG324335 | MG430833 | MG431048 | MG430876 | MG430919 | MG430962 | MG431005 |
| <i>Typha laxmannii</i>             | China, Qinghai                  | Tu518-1            | <i>T. laxmannii_China4</i>       | MG324336 | MG430834 | MG431049 | MG430877 | MG430920 | MG430963 | MG431006 |
| <i>Typha laxmannii</i>             | Germany, Bavaria                | D/0222             | <i>T. laxmannii_Germany</i>      | MG324337 | MG430835 | MG431050 | MG430878 | MG430921 | MG430964 | MG431007 |
| <i>Typha minima</i>                | China, Shaanxi                  | Xu5235             | <i>T. minima_China</i>           | MG324338 | MG430836 | MG431051 | MG430879 | MG430922 | MG430965 | MG431008 |
| <i>Typha minima</i>                | Germany, Bavaria                | D/0054             | <i>T. minima_Germany</i>         | MG324339 | MG430837 | MG431052 | MG430880 | MG430923 | MG430966 | MG431009 |
| <i>Typha elephantina</i>           | China, Yunnan                   | Tu506              | <i>T. elephantina_China1</i>     | MG324340 | MG430838 | MG431053 | MG430881 | MG430924 | MG430967 | MG431010 |
| <i>Typha elephantina</i>           | China, Yunnan                   | Tu515              | <i>T. elephantina_China2</i>     | MG324341 | MG430839 | MG431054 | MG430882 | MG430925 | MG430968 | MG431011 |
| <i>Typha elephantina</i>           | Pakistan, Khyber<br>Pakhtunkhwa | S.K.Marwat<br>s.n. | <i>T. elephantina_Pakistan</i>   | MG324342 | MG430840 | MG431055 | MG430883 | MG430926 | MG430969 | MG431012 |
| <i>Typha capensis</i>              | South Africa,<br>Hogsback       | S. Compton<br>s.n  | <i>T. capensis_South Africa1</i> | MG324312 | MG430810 | MG431025 | MG430853 | MG430896 | MG430939 | MG430982 |
| <i>Typha capensis</i>              | South Africa, Free<br>State     | Wen10075           | <i>T. capensis_South Africa2</i> | MG324313 | MG430811 | MG431026 | MG430854 | MG430897 | MG430940 | MG430983 |
| <i>Typha capensis</i>              | South Africa,<br>KwaZulu-Natal  | Wen10085           | <i>T. capensis_South Africa3</i> | MG324314 | MG430812 | MG431027 | MG430855 | MG430898 | MG430941 | MG430984 |
| <i>Typha<br/>shuttleworthii</i>    | Germany, Bavaria                | D/0055             | <i>T. shuttleworthii_Germany</i> | MG324322 | MG430820 | MG431035 | MG430863 | MG430906 | MG430949 | MG430992 |
| <i>Sparganium<br/>stoloniferum</i> | China, Heilongjiang             | Xu3874             | <i>S. stoloniferum_China</i>     | MG324344 | MG430842 | MG431057 | MG430885 | MG430928 | MG430971 | MG431014 |
| <i>Sparganium<br/>eurycarpum</i>   | USA, Virginia                   | Strong s.n.        | <i>S. eurycarpum_USA</i>         | MG324343 | MG430841 | MG431056 | MG430884 | MG430927 | MG430970 | MG431013 |
| <i>Sparganium<br/>glomeratum</i>   | China, Heilongjiang             | Xu3905             | <i>S. glomeratum_China</i>       | MG324345 | MG430843 | MG431058 | MG430886 | MG430929 | MG430972 | MG431015 |

**Table S3** The primers of seven chloroplast DNA regions and their sources

| Regions             | Name and sequence (5'-3')                                                                                                 | Reference               |
|---------------------|---------------------------------------------------------------------------------------------------------------------------|-------------------------|
| <i>atpB-rbcL</i>    | <i>atpB</i> : GTG GAA ACC CCG GGA CGA GAA GTA GT<br><i>rbcL</i> : ACT TGC TTT AGT TTC TGT TTG TGG TGA                     | Hodges and Arnold, 1994 |
| <i>psbA-trnH</i>    | <i>trnH</i> <sup>GUU</sup> : CGC GCA TGG TGG ATT CAC AAT CC<br><i>psbA</i> : GTT ATG CAT GAA CGT AAT GCT C                | Shaw et al., 2005       |
| <i>psbD-trnT</i>    | <i>psbD</i> : CTC CGT ARC CAG TCA TCC ATA<br><i>trnT</i> <sup>(GGU)</sup> -R: CCC TTT TAA CTC AGT GGT AG                  | Shaw et al., 2007       |
| <i>rpl32-trnL</i>   | <i>trnL</i> <sup>(UAG)</sup> : CTG CTT CCT AAG AGC AGC GT<br><i>rpl32</i> -F: CAG TTC CAA AA A AAC GTA CTT C              | Shaw et al., 2007       |
| <i>rps16 intron</i> | <i>rpS16F</i> : AAA CGA TGT GGT ARA AAG CAA C<br><i>rpS16R</i> : AAC ATC WAT TGC AAS GAT TCG ATA                          | Shaw et al., 2005       |
| <i>rps16-trnK</i>   | <i>rpS16x2F2</i> : AAA GTG GGT TTT TAT GAT CC<br><i>trnK</i> <sup>(UUU)</sup> <sub>x1</sub> : TTA AAA GCC GAG TAC TCT ACC | Shaw et al., 2007       |
| <i>trnL-trnF</i>    | <i>e</i> : GGT TCA AGT CCC TCT ATC CC<br><i>f</i> : ATT TGA ACT GGT GAC ACG AG                                            | Taberlet et al., 1991   |

Hodges SA, Arnold ML. 1994. Columbines: A geographically widespread species flock. *Proceeding of the National Academy of Sciences of the United States of America* 91: 5129-5132.

Shaw J, Lickey EB, Beck JT, Farmer SB, Liu W, Miller J, Siripun KC, Winder CT, Schilling EE, Small RL. 2005. The tortoise and the hare II: relative utility of 21 noncoding chloroplast DNA sequences for phylogenetic analysis. *American Journal of Botany* 92: 142-166.

Shaw J, Lickey EB, Schilling EE, Small RL. 2007. Comparison of whole chloroplast genome sequences to choose noncoding regions for phylogenetic studies in angiosperms: the tortoise and the hare III. *American Journal of Botany* 94:275-288.

Taberlet P, Gielly L, Pautou G, Bouvet J. 1991. Universal primers for amplification of three non-coding regions of chloroplast DNA. *Plant Molecular Biology* 17:1105-1109.

**Table S4** Dispersal matrix among 7 areas used in the DEC analysis. Letters represent biogeographic regions: A - North America, B - Indo-Pacific, C - West Eurasia, D - East Eurasia, E - Africa, F - South America, and G - Australia. Dispersal probabilities among areas are given for 0 - 5 Ma, 5 - 33 Ma, 33 - 49 Ma, respectively.

|   | B            | C            | D            | E              | F            | G             |
|---|--------------|--------------|--------------|----------------|--------------|---------------|
| A | 0.1/0.1/0.25 | 0.1/0.25/0.5 | 0.1/0.1/0.25 | 0.1/0.1/0.25   | 1.0/0.75/0.5 | 0.1/0.1/0.1   |
| B | /            | 1.0/1.0/0.75 | 1.0/1.0/0.75 | 0.25/0.25/0.25 | 0.1/0.1/0.1  | 0.75/0.5/0.25 |
| C |              | /            | 1.0/1.0/1.0  | 0.75/0.5/0.25  | 0.1/0.1/0.1  | 0.25/0.25/0.1 |
| D |              |              | /            | 0.5/0.25/0.1   | 0.1/0.1/0.1  | 0.5/0.25/0.1  |
| E |              |              |              | /              | 0.1/0.1/0.5  | 0.1/0.1/0.1   |
| F |              |              |              |                | /            | 0.1/0.1/0.1   |
